# Supplementary material for: NFκB1 is essential to prevent the development of multiorgan autoimmunity by limiting IL-6 production in follicular B cells
Source: PubMed Central journal article supplement — J Exp Med. 2016 Apr 4;213(4):621–41. doi: 10.1084/jem.20151182 (PMC4821646; doi:10.1084/jem.20151182), 2016-04-04
Supplement: supp_jem.20151182_JEM_20151182_sm.pdf [file supp_jem.20151182_JEM_20151182_sm.pdf]

## SUPPLEMENTAL MATERIAL

de Valle et al., <http://www.jem.org/cgi/content/full/jem.20151182/DC1>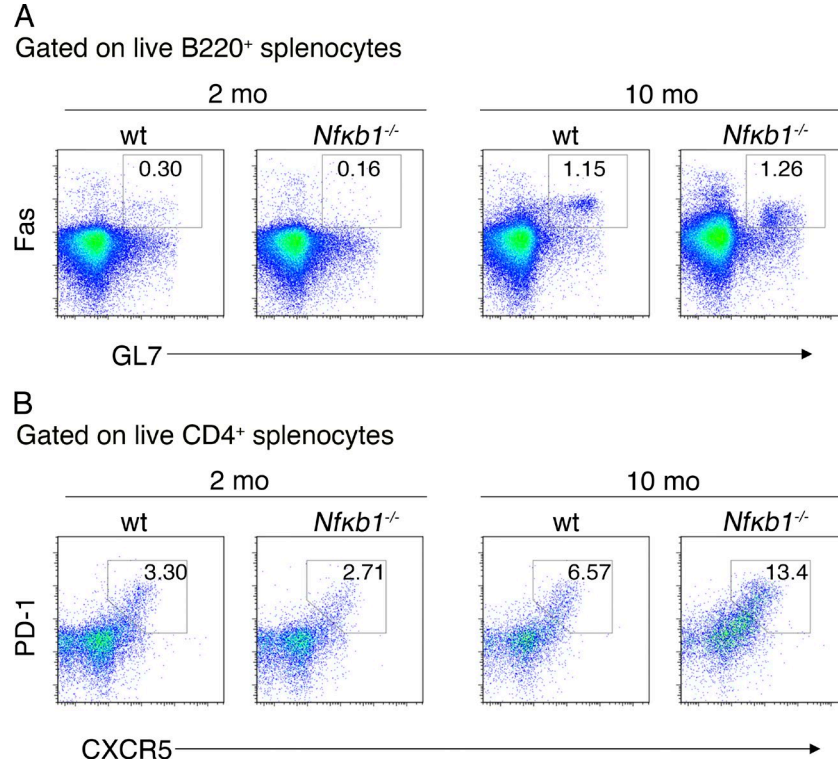

Figure S1. **Flow cytometry gating strategies for Fig. 1.** Flow cytometric analysis of GC B and T<sub>FH</sub> cells in the spleens of WT and *Nfkb1*<sup>-/-</sup> mice at 2 and 10 mo. (A) Dot plots correspond to Fig. 1 E and show FAS versus GL7 expression on live B220<sup>+</sup> splenocytes. The numbers indicate the proportion of FAS<sup>+</sup>GL7<sup>+</sup> GC B cells. (B) Dot plots correspond to Fig. 1 G and show PD-1 versus CXCR5 expression on live CD4<sup>+</sup> splenocytes. The numbers indicate the proportion of PD-1<sup>+</sup>CXCR5<sup>+</sup> T<sub>FH</sub> cells. Data are derived from two independent experiments ( $n = 3\text{--}5$  mice/group).

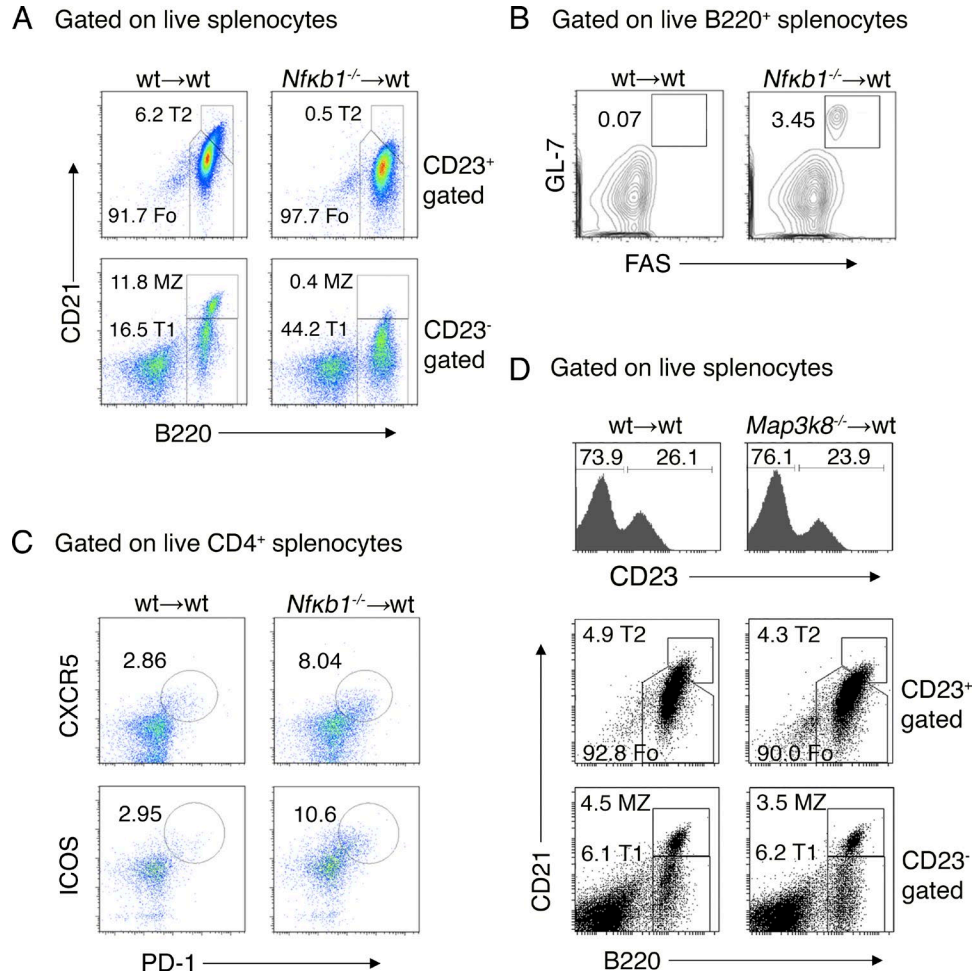

Figure S2. **Flow cytometry gating strategies for Fig. 3.** BM chimera mice were established as described in Fig. 2 and examined 7–10 mo after transplantation. (A) CD21 and B220 expression gated on splenic CD23<sup>+</sup> or CD23<sup>-</sup> populations as indicated. Gated regions show the proportion of T1 (CD23<sup>-</sup>B220<sup>+</sup>CD21<sup>lo</sup>), T2 (CD23<sup>+</sup>B220<sup>+</sup>CD21<sup>hi</sup>), MZ (CD23<sup>-</sup>B220<sup>+</sup>CD21<sup>hi</sup>), and Fo (CD23<sup>+</sup>B220<sup>+</sup>CD21<sup>lo</sup>) B cells enumerated in Fig. 3 B. (B) Gating strategy for Fig. 3 C showing FAS versus GL7 expression on live B220<sup>+</sup> splenocytes. The numbers indicate the proportion of GC B cells (B220<sup>+</sup>FAS<sup>+</sup>GL7<sup>+</sup>). (C) Gating strategy for Fig. 3 D showing CXCR5 or ICOS versus PD-1 expression on CD4<sup>+</sup> splenocytes. Numbers indicate the proportion of T<sub>FH</sub> cells (CD4<sup>+</sup>CXCR5<sup>+</sup>ICOS<sup>+</sup>PD-1<sup>+</sup>). Data in A–C were derived from at least three independent experiments (*n* = 6 mice/group). (D) Histograms show CD23 expression on total splenocytes, and dot plots show CD21 and B220 expression on gated CD23<sup>+</sup> or CD23<sup>-</sup> populations. The numbers represent the proportion of T1, T2, MZ, and Fo B cells shown in Fig. 3 I. Data were derived from two independent experiments (*n* = 4–5 mice/group).

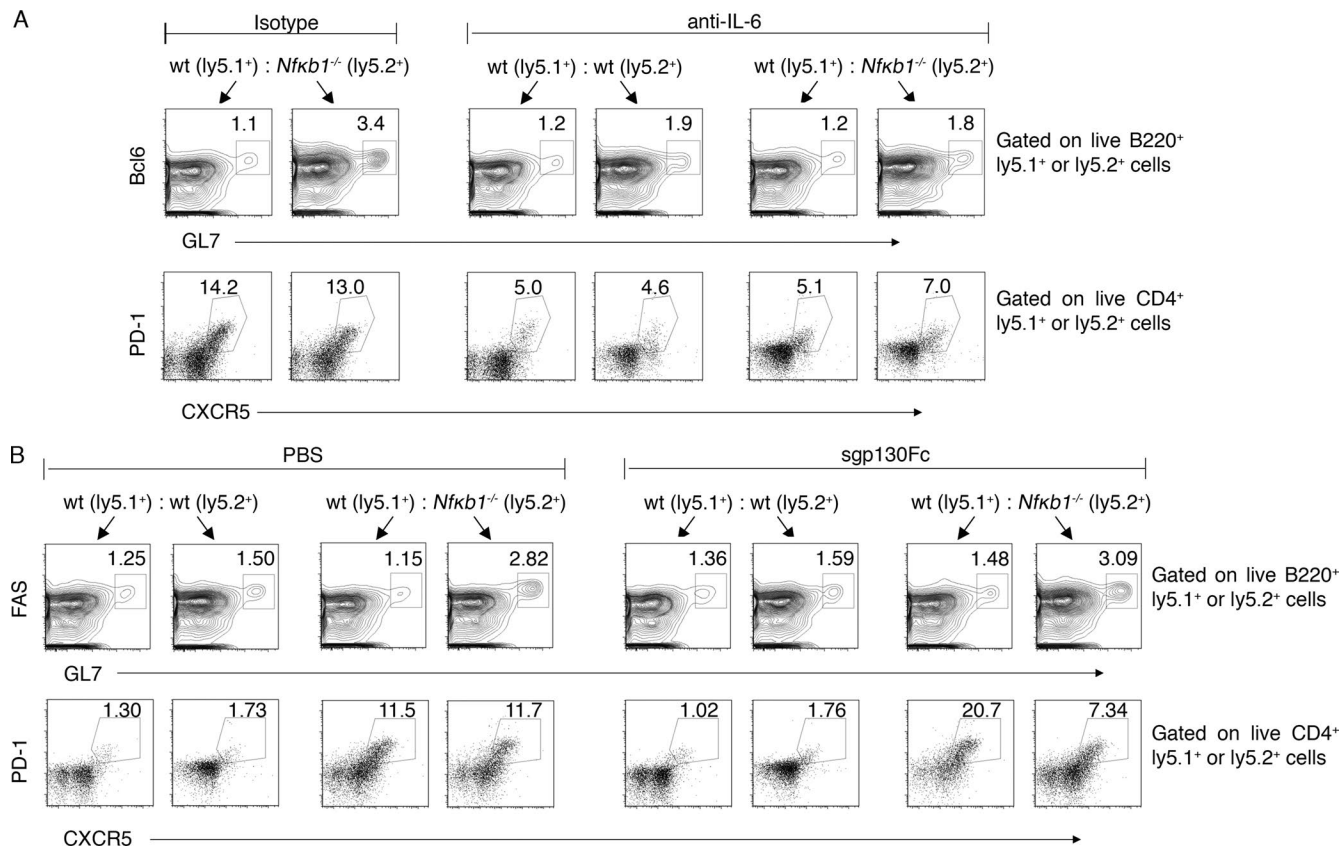

Figure S3. **Flow cytometry gating strategies for Fig. 7.** (A) As described in Fig. 7 (C and D), mBM-reconstituted mice of the indicated groups at 8 wk after transplantation were injected twice weekly for 6 wk with anti-IL-6 Ab or an Ig isotype-matched control Ab. Dot plots show gating strategies for the identification of GC B (B220<sup>+</sup>GL7<sup>+</sup>Bcl6<sup>+</sup>) and T<sub>FH</sub> (CD4<sup>+</sup>CXCR5<sup>+</sup>PD-1<sup>+</sup>) cells from WT and *Nfkb1*<sup>-/-</sup> compartments defined on the basis of ly5.1 or ly5.2 expression (as indicated). (B) As described in Fig. 7 (E and F), mBM-reconstituted mice were injected twice weekly for 6 wk with sgp130Fc or PBS 8 wk after transplantation. Dot plots show gating of WT or *Nfkb1*<sup>-/-</sup> splenic GC B (B220<sup>+</sup>GL7<sup>+</sup>FAS<sup>+</sup>) and T<sub>FH</sub> cells (CD4<sup>+</sup>CXCR5<sup>+</sup>PD-1<sup>+</sup>). All data are representative of two individual experiments (*n* = 4–8 mice per group).

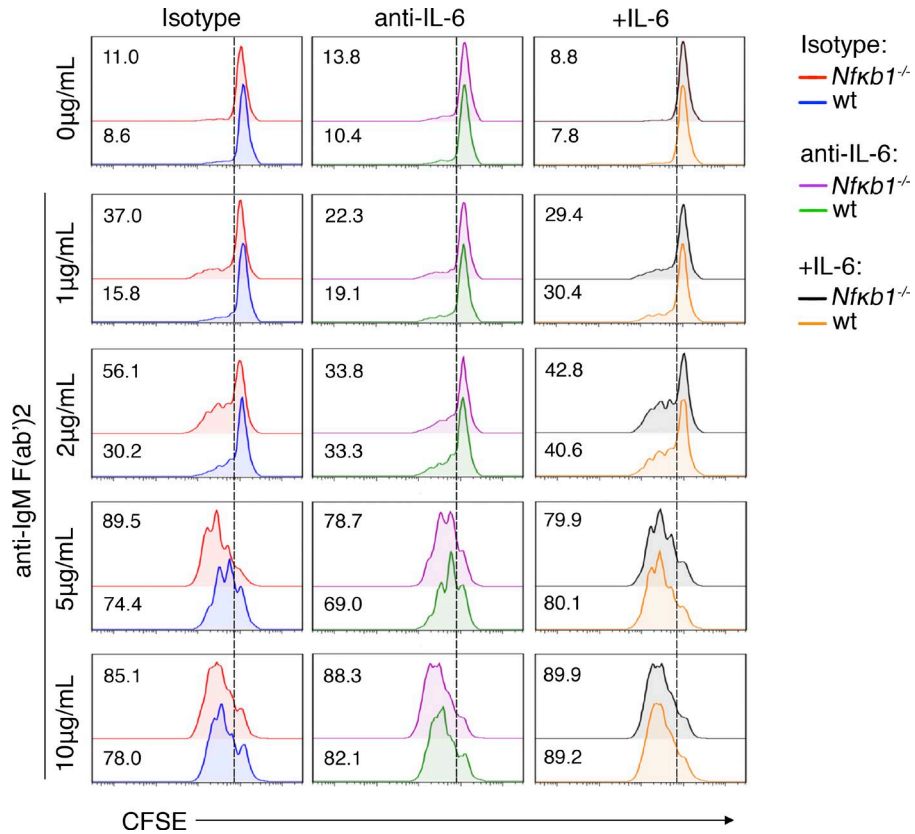

Figure S4. **Flow cytometry gating strategy for Fig. 9.** WT and *Nfkb1*<sup>-/-</sup> Fo B cells were labeled with CFSE and co-cultured as described in Fig. 9 (B and C). Histograms show CFSE expression profiles at 72 h, and numbers indicate the percentage of divided (CFSE<sup>-</sup>) cells. Data are representative of two independent experiments (*n* = 5 mice/genotype).

Table S1. **Primers used for qPCR of ChIP DNA**

| Gene                           | Forward primer (5'-3')  | Reverse primer (5'-3')   |
|--------------------------------|-------------------------|--------------------------|
| <i>Il-6</i> region 1           | TGGTAAATACAGACATTTGGGTG | TTGGGATAAAGTTGAGACAGGCT  |
| <i>Il-6</i> region 2           | AGCCATTGCCCCAGGAT       | GCACATATGTAGCAGAGGACTGT  |
| <i>Il-6</i> region 3           | CCTCTTCCCTGGGTCTCA      | TCAGAAGTCTCAACTAACCTGGAC |
| <i>Il-6</i> region 4           | GGGGTTTCCAATTCAGTCCA    | AGTTGGTCCAATGACTAGCCC    |
| <i>Tnfr</i> (Yan et al., 2012) | AACCTCTGCCCCCGATG       | TCCTCGCTGAGGGAGCTTCTGC   |

REFERENCE

Yan, Q., R.J. Carmody, Z. Qu, Q. Ruan, J. Jager, S.E. Mullican, M.A. Lazar, and Y.H. Chen. 2012. Nuclear factor-κB binding motifs specify Toll-like receptor-induced gene repression through an inducible repressosome. *Proc. Natl. Acad. Sci. USA*. 109:14140–14145. <http://dx.doi.org/10.1073/pnas.1119842109>
